# Supplementary material
Source: publisher figshare collection journal article supplement (https://gsajournals.figshare.com/ndownloader/files/21866190)
Supplement: Supplementary file 1 [file 21866190]

**Table S3.** **Grain quality traits between TN13 and NIL_TN13*sbn***

| Grain quality traits**1** | **TN13** | **NIL_TN13*sbn*** | ***P-*value2** |
| --- | --- | --- | --- |
| Amylose content (%) | 19.3 ± 0.3 | 19.5 ± 0.5 | 0.548 |
| Protein content (%) | 6.8 ± 0.3 | 7.1 ± 0.6 | 0.502 |
| Chalky grain ratio (%) | 71.1 ± 2.1 | 69.6 ± 4.5 | 0.644 |

1The experiments were carried out in paddy fields at Chia-Yi, Taiwan, in the first crop season of 2019. A completely randomized design with three replications was used in all trials. Plant spacing was 15 cm between plants and 30 cm between rows, with a single plant per hill. Data are shown as mean ± SD. (*n* = 6 plants).

2 The *P*-value indicates the significance of the difference between TN13 and NIL_TN13*sbn* based on Student’s *t*-test.
